# Supplementary material
Source: PubMed Central journal article supplement (PMC7167750)

**Table S1. Multivariable Analysis of Associations with MACE, reduced LVEF defined as LVEF<50%**

| Variable        | No Ischemia<br>(Ischemic TPD <1%) |         | Minimal<br>(1 - < 5% ischemic TPD) |         | Mild<br>(5 - <10% ischemic TPD) |         |
|-----------------|-----------------------------------|---------|------------------------------------|---------|---------------------------------|---------|
|                 | Adjusted HR<br>(95% CI)           | P-value | Adjusted HR<br>(95% CI)            | P-value | Adjusted HR<br>(95% CI)         | P-value |
| Age             | 1.04 (1.03 – 1.05)                | <0.001  | 1.04 (1.03 – 1.05)                 | <0.001  | 1.02 (1.02 – 1.03)              | <0.001  |
| Male            | 1.89 (1.55 – 2.31)                | <0.001  | --                                 | --      | --                              | --      |
| Body mass index | 0.96 (0.94 – 0.98)                | <0.001  | 0.98 (0.97 – 0.99)                 | 0.002   | --                              | --      |
| Hypertension    | 1.42 (1.12 – 1.80)                | 0.004   | --                                 | --      | --                              | --      |
| Diabetes        | 1.46 (1.17 – 1.83)                | 0.001   | 1.79 (1.54 – 2.09)                 | <0.001  | 1.34 (1.12 – 1.60)              | 0.002   |
| Prior MI        | 1.49 (1.08 – 2.07)                | 0.016   | 1.27 (1.07 – 1.56)                 | 0.008   | 1.23 (1.01 – 1.49)              | 0.037   |
| Family History  | --                                | --      | 0.76 (0.64 – 0.92)                 | 0.004   | --                              | --      |
| Typical Angina  | --                                | --      | 0.66 (0.46 – 0.95)                 | 0.026   | --                              | --      |
| Exercise Stress | 0.43 (0.34 – 0.55)                | <0.001  | 0.54 (0.45 – 0.65)                 | <0.001  | 0.53 (0.42 – 0.67)              | <0.001  |
| Reduced LVEF    | --                                | --      | 1.35 (1.10 – 1.65)                 | 0.003   | 1.50 (1.19 – 1.88)              | <0.001  |
| Shape Index     | --                                | --      | 1.03 (1.02 - 1.04)                 | <0.001  | 1.03 (1.02 - 1.04)              | <0.001  |
| TID             | 1.80 (1.23 – 2.63)                | 0.002   | 1.22 (0.88 – 1.69)                 | 0.240   | 1.50 (1.02 – 2.20)              | 0.039   |
| Post-stress WMA | 1.11 (0.77 – 1.61)                | 0.582   | 1.22 (1.01 – 1.47)                 | 0.043   | 0.90 (0.73 – 1.10)              | 0.307   |

Table S1: Multivariable models of associations with MACE stratified by extent of ischemia and defining reduced LVEF as resting LVEF<50%. CAD – coronary artery disease, HR – hazard ratio, LVEF – left ventricular ejection fraction, MI – myocardial infarction, TID – transient ischemic dilation, WMA – wall motion abnormality. -- indicates variable not included in model.

**Table S2. Univariable Analysis of Associations with MACE**

| Variable                | No Ischemia<br>(TPD <1%)  |                | Minimal<br>(1-<5% ischemic TPD) |                | Mild<br>(5-<10% ischemic TPD) |                |
|-------------------------|---------------------------|----------------|---------------------------------|----------------|-------------------------------|----------------|
|                         | Unadjusted HR<br>(95% CI) | P-value        | Unadjusted HR<br>(95% CI)       | P-value        | Unadjusted HR<br>(95% CI)     | P-value        |
| Age                     | <b>1.06 (1.05 – 1.06)</b> | < <b>0.001</b> | <b>1.05 (1.05 – 1.06)</b>       | < <b>0.001</b> | <b>1.03 (1.03 – 1.04)</b>     | < <b>0.001</b> |
| Male                    | <b>1.43 (1.17 – 1.74)</b> | < <b>0.001</b> | 0.99 (0.86 – 1.15)              | 0.926          | 0.97 (0.80 – 1.19)            | 0.792          |
| Body mass index         | <b>0.96 (0.95 – 0.98)</b> | < <b>0.001</b> | <b>0.98 (0.97 – 0.99)</b>       | <b>0.001</b>   | <b>0.98 (0.96 – 0.99)</b>     | <b>0.005</b>   |
| Hypertension            | <b>1.99 (1.58 – 2.50)</b> | < <b>0.001</b> | <b>1.63 (1.39 – 1.92)</b>       | < <b>0.001</b> | <b>1.60 (1.30 – 1.98)</b>     | < <b>0.001</b> |
| Diabetes                | <b>1.62 (1.30 – 2.01)</b> | < <b>0.001</b> | <b>1.90 (1.64 – 2.20)</b>       | < <b>0.001</b> | <b>1.48 (1.23 – 1.76)</b>     | < <b>0.001</b> |
| Dyslipidemia            | <b>1.28 (1.05 – 1.57)</b> | <b>0.017</b>   | <b>1.23 (1.06 – 1.44)</b>       | <b>0.007</b>   | 0.96 (0.80 – 1.17)            | 0.712          |
| Current Smoker          | 0.92 (0.71 – 1.20)        | 0.564          | 0.98 (0.82 – 1.18)              | 0.834          | <b>1.20 (0.97 – 1.48)</b>     | <b>0.097</b>   |
| PVD                     | <b>2.27 (1.75 – 2.96)</b> | < <b>0.001</b> | <b>1.72 (1.44 – 2.06)</b>       | < <b>0.001</b> | <b>1.73 (1.41 – 2.12)</b>     | < <b>0.001</b> |
| Prior MI                | <b>1.97 (1.43 – 2.72)</b> | < <b>0.001</b> | <b>1.60 (1.34 – 1.92)</b>       | < <b>0.001</b> | <b>1.47 (1.22 – 1.77)</b>     | < <b>0.001</b> |
| Prior Revascularization | <b>1.98 (1.56 – 2.50)</b> | < <b>0.001</b> | <b>1.65 (1.42 – 1.92)</b>       | < <b>0.001</b> | <b>1.29 (1.08 – 1.54)</b>     | <b>0.004</b>   |
| Family History of CAD   | 0.83 (0.67 – 1.03)        | 0.096          | <b>0.61 (0.51 – 0.74)</b>       | < <b>0.001</b> | <b>0.77 (0.62 – 0.95)</b>     | <b>0.014</b>   |
| Typical Angina          | 0.96 (0.63 – 1.48)        | 0.864          | <b>0.67 (0.46 – 0.96)</b>       | <b>0.031</b>   | 1.05 (0.75 – 1.44)            | 0.802          |
| Exercise Stress         | <b>0.34 (0.27 – 0.42)</b> | < <b>0.001</b> | <b>0.36 (0.30 – 0.43)</b>       | < <b>0.001</b> | <b>0.38 (0.31 – 0.47)</b>     | < <b>0.001</b> |
| Reduced Resting LVEF    | 1.66 (0.74 – 3.72)        | 0.217          | <b>2.42 (1.87 – 3.14)</b>       | < <b>0.001</b> | <b>2.57 (2.08 – 3.18)</b>     | < <b>0.001</b> |
| Resting Defect >10%     | 2.09 (0.78 – 5.58)        | 0.144          | <b>1.95 (1.42 – 2.67)</b>       | < <b>0.001</b> | <b>1.66 (1.32 – 2.10)</b>     | < <b>0.001</b> |
| Stress LVEF             | 0.99 (0.98 – 1.00)        | 0.155          | <b>0.98 (0.97 – 0.98)</b>       | < <b>0.001</b> | <b>0.98 (0.97 – 0.98)</b>     | < <b>0.001</b> |
| Eccentricity Index      | <b>0.04 (0.00 – 0.80)</b> | <b>0.035</b>   | <b>0.01 (0.00 – 0.03)</b>       | < <b>0.001</b> | <b>0.00 (0.00 – 0.03)</b>     | < <b>0.001</b> |
| Shape index             | <b>1.01 (0.99 - 1.02)</b> | <b>0.238</b>   | <b>1.04 (1.03 - 1.05)</b>       | < <b>0.001</b> | <b>1.05 (1.04 - 1.06)</b>     | < <b>0.001</b> |
| TID                     | <b>1.90 (1.30 – 2.78)</b> | <b>0.001</b>   | 1.21 (0.87 – 1.67)              | 0.260          | <b>1.40 (0.98 – 2.02)</b>     | <b>0.080</b>   |
| Post-Stress WMA         | <b>1.45 (1.01 – 2.10)</b> | <b>0.046</b>   | <b>1.66 (1.38 – 1.99)</b>       | < <b>0.001</b> | <b>1.24 (1.02 – 1.51)</b>     | <b>0.035</b>   |

Table S2: Association between clinical and imaging factors with MACE. Variables associated with MACE in bold (p=< 0.100). CAD – coronary artery disease, CI – confidence interval, HR – hazard ratio, MI – myocardial infarction, LVEF – left ventricular ejection fraction, PVD – peripheral vascular disease, TID – transient ischemic dilation, TPD – total perfusion deficit, WMA – wall motion abnormality.

**Table S3. Multivariable Analysis of Associations with all-cause mortality or non-fatal MI**

| Variable               | No Ischemia<br>(Ischemic TPD <1%) |         | Minimal<br>(1 - < 5% ischemic TPD) |         | Mild<br>(5 - <10% ischemic TPD) |         |
|------------------------|-----------------------------------|---------|------------------------------------|---------|---------------------------------|---------|
|                        | Adjusted HR<br>(95% CI)           | P-value | Adjusted HR<br>(95% CI)            | P-value | Adjusted HR<br>(95% CI)         | P-value |
| <b>Age</b>             | 1.05 (1.04 – 1.06)                | <0.001  | 1.04 (1.03 – 1.06)                 | <0.001  | 1.03 (1.02 – 1.04)              | <0.001  |
| <b>Male</b>            | 1.85 (1.49 – 2.29)                | <0.001  | --                                 | --      | --                              | --      |
| <b>Body mass index</b> | 0.96 (0.94 – 0.98)                | <0.001  | 0.98 (0.97 – 0.99)                 | 0.005   | --                              | --      |
| <b>Diabetes</b>        | 1.58 (1.24 – 2.00)                | <0.001  | 1.80 (1.54 – 2.11)                 | <0.001  | 1.30 (1.07 – 1.57)              | 0.007   |
| <b>Family History</b>  | --                                | --      | 0.78 (0.64 – 0.94)                 | 0.011   | --                              | --      |
| <b>Typical Angina</b>  | --                                | --      | 0.65 (0.44 – 0.96)                 | 0.029   | --                              | --      |
| <b>Exercise Stress</b> | 0.38 (0.29 – 0.87)                | <0.001  | 0.51 (0.42 – 0.61)                 | <0.001  | 0.51 (0.40 – 0.50)              | <0.001  |
| <b>Reduced LVEF</b>    | --                                | --      | 1.50 (1.13 – 2.00)                 | 0.006   | 1.89 (1.46 – 2.44)              | <0.001  |
| <b>Shape Index</b>     | --                                | --      | 1.03 (1.02 - 1.04)                 | <0.001  | 1.03 (1.01 - 1.04)              | <0.001  |
| <b>TID</b>             | 1.87 (1.26 – 2.78)                | 0.002   | 1.28 (0.92 – 1.80)                 | 0.148   | 1.50 (1.01 – 2.23)              | 0.047   |
| <b>Post-stress WMA</b> | 1.21 (0.82 – 1.77)                | 0.334   | 1.27 (1.04 – 1.55)                 | 0.018   | 0.99 (0.80 – 1.22)              | 0.924   |

Table S3: Multivariable models of associations with all-cause mortality or non-fatal MI, stratified by extent of ischemia. CAD – coronary artery disease, HR – hazard ratio, LVEF – left ventricular ejection fraction, MI – myocardial infarction, TID – transient ischemic dilation, WMA – wall motion abnormality. -- indicates variable not included in model.

**Table S4. Multivariable Analysis of Associations with all-cause mortality**

| Variable               | No Ischemia<br>(Ischemic TPD <1%) |         | Minimal<br>(1- < 5% ischemic TPD) |         | Mild<br>(5 - <10% ischemic TPD) |         |
|------------------------|-----------------------------------|---------|-----------------------------------|---------|---------------------------------|---------|
|                        | Adjusted HR<br>(95% CI)           | P-value | Adjusted HR<br>(95% CI)           | P-value | Adjusted HR<br>(95% CI)         | P-value |
| <b>Age</b>             | 1.05 (1.04 – 1.06)                | <0.001  | 1.05 (1.04 – 1.06)                | <0.001  | 1.04 (1.03 – 1.05)              | <0.001  |
| <b>Male</b>            | 1.79 (1.43 – 2.25)                | <0.001  | --                                | --      | --                              | --      |
| <b>Body mass index</b> | 0.96 (0.94 – 0.98)                | <0.001  | 0.98 (0.97 – 0.99)                | 0.009   | --                              | --      |
| <b>Diabetes</b>        | 1.65 (1.29 – 2.12)                | <0.001  | 1.87 (1.58 – 2.22)                | <0.001  | 1.35 (1.10 – 1.67)              | 0.005   |
| <b>Family History</b>  | --                                | --      | 0.73 (0.59 – 0.91)                | 0.006   | --                              | --      |
| <b>Typical Angina</b>  | --                                | --      | 0.55 (0.35 – 0.87)                | 0.010   | --                              | --      |
| <b>Exercise Stress</b> | 0.37 (0.29 – 0.49)                | <0.001  | 0.41 (0.33 – 0.52)                | <0.001  | 0.41 (0.31 – 0.54)              | <0.001  |
| <b>Reduced LVEF</b>    | --                                | --      | 1.57 (1.16 – 2.12)                | 0.003   | 1.91 (1.45 – 2.52)              | <0.001  |
| <b>Shape Index</b>     | --                                | --      | 1.03 (1.02 - 1.04)                | <0.001  | 1.03 (1.02 – 1.05)              | <0.001  |
| <b>TID</b>             | 1.71 (1.11 – 2.65)                | 0.015   | 1.34 (0.91 – 1.98)                | 0.135   | 1.35 (0.81 – 2.23)              | 0.245   |
| <b>Post-stress WMA</b> | 1.70 (1.10 – 2.63)                | 0.017   | 1.18 (0.91 – 1.52)                | 0.209   | 1.08 (0.83 – 1.39)              | 0.924   |

Table S4: Multivariable models of associations with all-cause mortality stratified by extent of ischemia. CAD – coronary artery disease, HR – hazard ratio, LVEF – left ventricular ejection fraction, MI – myocardial infarction, TID – transient ischemic dilation, WMA – wall motion abnormality. -- indicates variable not included in model.

**Table S5. Multivariable Analysis of Associations with Non-fatal Events**

| Variable               | No Ischemia<br>(Ischemic TPD <1%) |         | Minimal<br>(1- < 5% ischemic TPD) |         | Mild<br>(5 - <10% ischemic TPD) |         |
|------------------------|-----------------------------------|---------|-----------------------------------|---------|---------------------------------|---------|
|                        | Adjusted HR<br>(95% CI)           | P-value | Adjusted HR<br>(95% CI)           | P-value | Adjusted HR<br>(95% CI)         | P-value |
| <b>Age</b>             | 1.04 (1.02 – 1.06)                | <0.001  | 1.02 (1.01 – 1.03)                | 0.001   | 1.00 (0.99 – 1.02)              | 0.607   |
| <b>Male</b>            | 2.23 (1.48 – 3.36)                | <0.001  | --                                | --      | --                              | --      |
| <b>Body mass index</b> | --                                | --      | 0.97 (0.94 – 0.99)                | 0.015   | --                              | --      |
| <b>Diabetes</b>        | --                                | --      | 1.81 (1.35 – 2.41)                | <0.001  | --                              | --      |
| <b>Exercise Stress</b> | 0.53 (0.35 – 0.82)                | 0.004   | --                                | --      | 0.54 (0.38 – 0.79)              | 0.001   |
| <b>Shape Index</b>     | --                                | --      | --                                | --      | 1.03 (1.01 – 1.05)              | 0.001   |
| <b>TID</b>             | 1.79 (0.83 – 3.86)                | 0.141   | 0.84 (0.39 – 1.78)                | 0.645   | 1.63 (0.88 – 3.01)              | 0.117   |
| <b>Post-stress WMA</b> | 0.76 (0.24 – 2.42)                | 0.647   | 1.72 (1.16 – 2.55)                | 0.007   | 0.96 (0.64 – 1.43)              | 0.837   |

Table S5: Multivariable models of associations with non-fatal events stratified by extent of ischemia. Events included non-fatal myocardial infarction (MI) or admission for unstable angina. CAD – coronary artery disease, HR – hazard ratio, LVEF – left ventricular ejection fraction, TID – transient ischemic dilation, WMA – wall motion abnormality. -- indicates variable not included in model.

**Figure S1 - Associations with MACE After Excluding Patients with LVEF <50%**

Reference Moderate to Severe Ischemia

No High Risk Features

**HR  
(95% CI)**

**No Ischemia**

No High Risk Features 0.35 (0.27 - 0.46)

Transient Ischemic Dilation 0.67 (0.45 - 1.00)

Post-Stress WMA 0.51 (0.32 - 0.80)

**Minimal Ischemia**

No High Risk Features 0.48 (0.37 - 0.62)

Transient Ischemic Dilation 0.71 (0.46 - 1.11)

Post-Stress WMA 0.72 (0.52 - 0.99)

**Mild Ischemia**

No High Risk Features 0.81 (0.61 - 1.06)

Transient Ischemic Dilation 1.18 (0.75 - 1.88)

Post-Stress WMA 0.92 (0.64 - 1.30)

0.00 0.20 0.40 0.60 0.80 1.00 1.20 1.40 1.60 1.80 2.00

*Lower Risk*

**Unadjusted Hazard Ratio**

*Higher Risk*

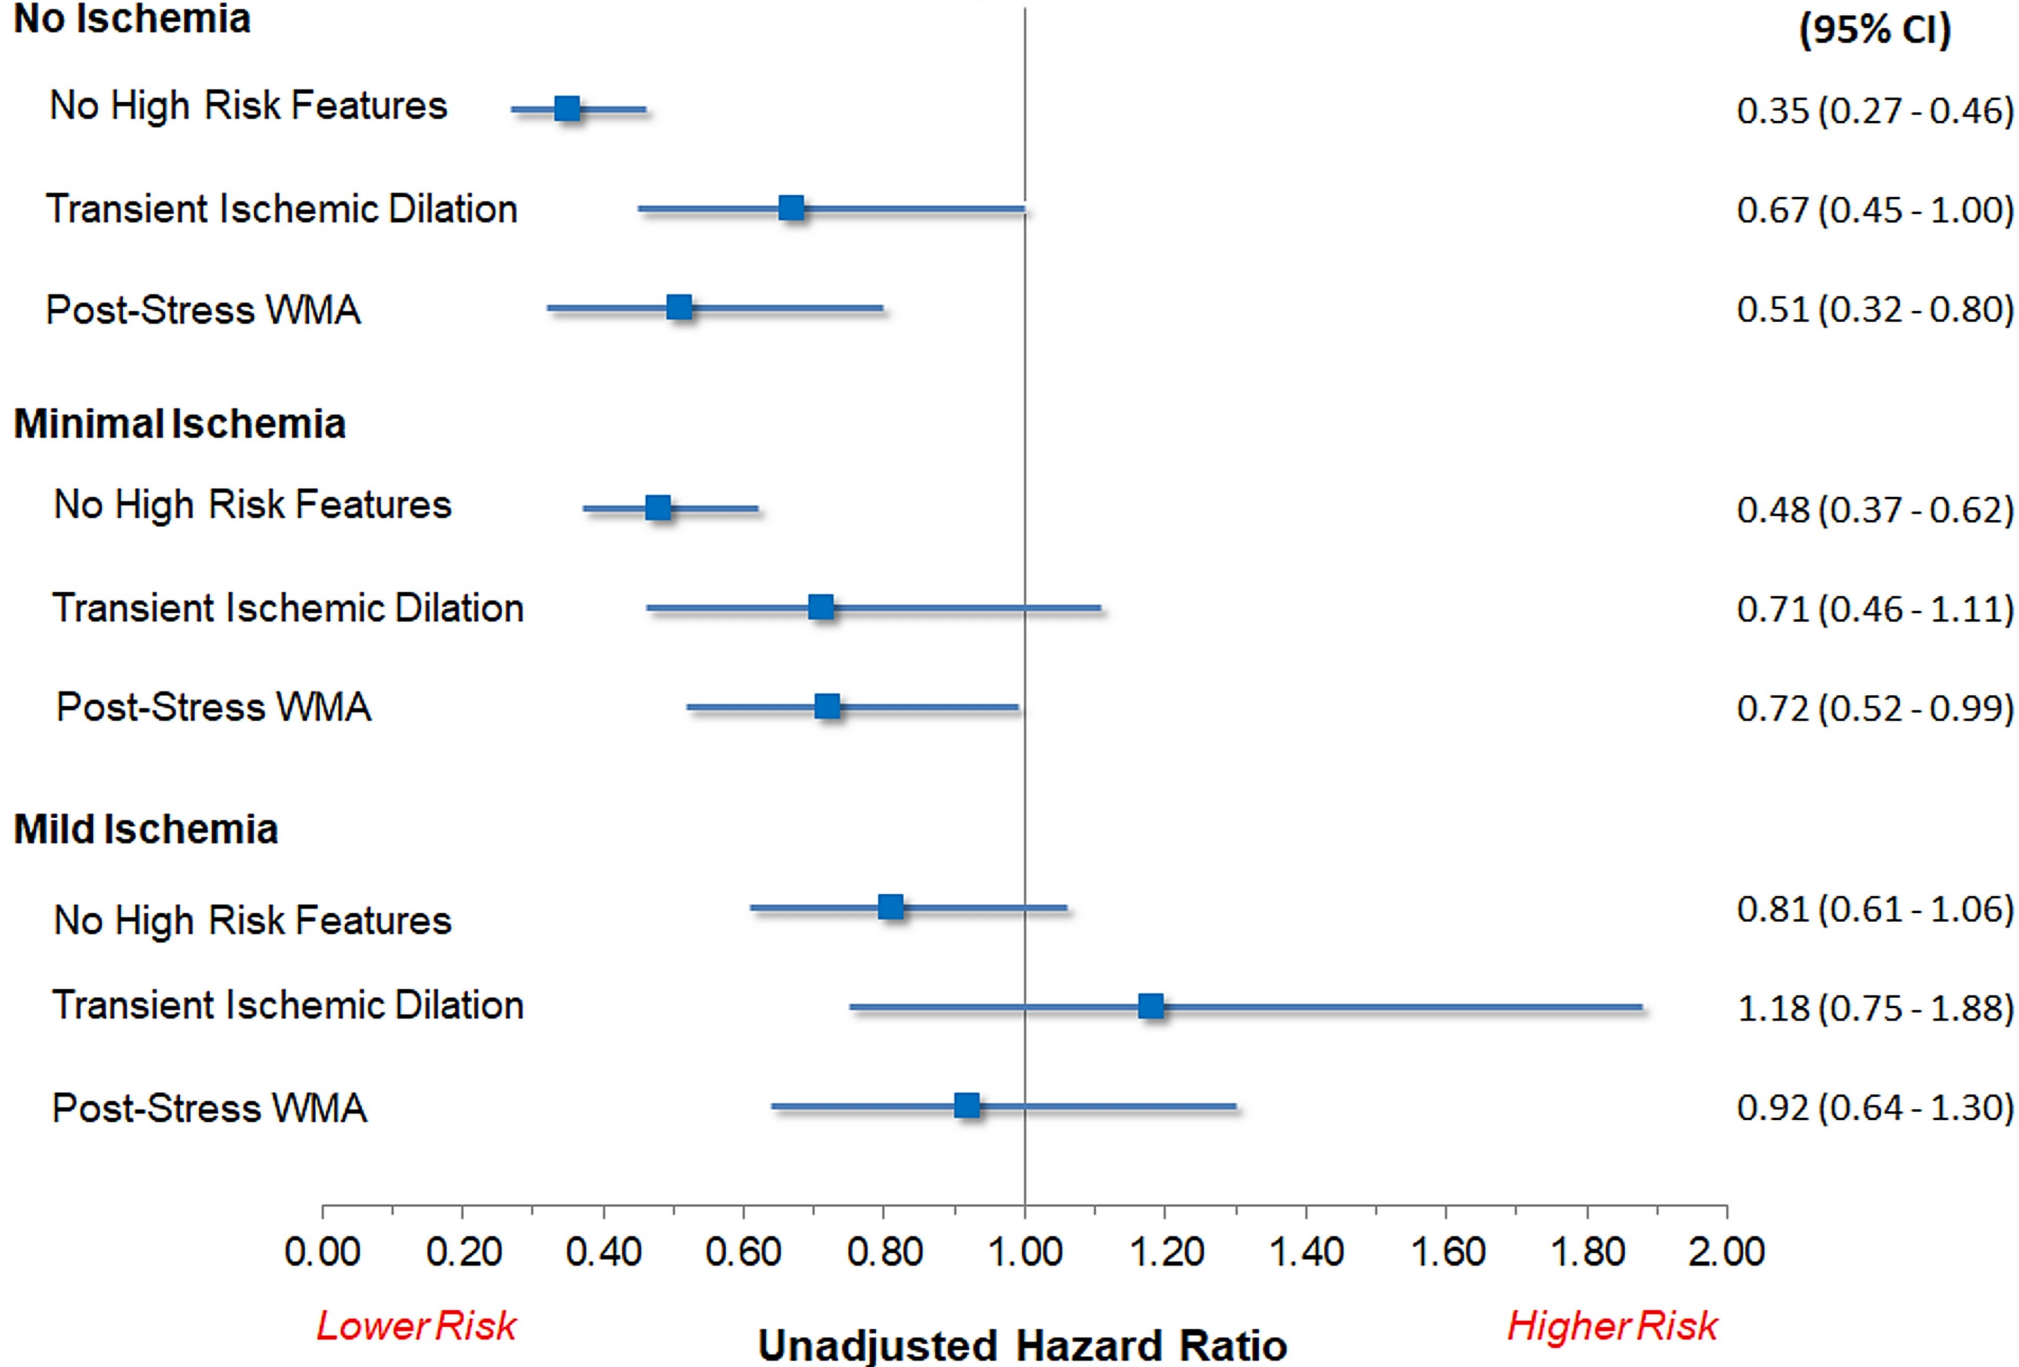

**Figure S2 - Associations with All-Cause Mortality or Non-Fatal MI**

Reference Moderate to Severe Ischemia

No High Risk Features

**HR  
(95% CI)**

**No Ischemia**

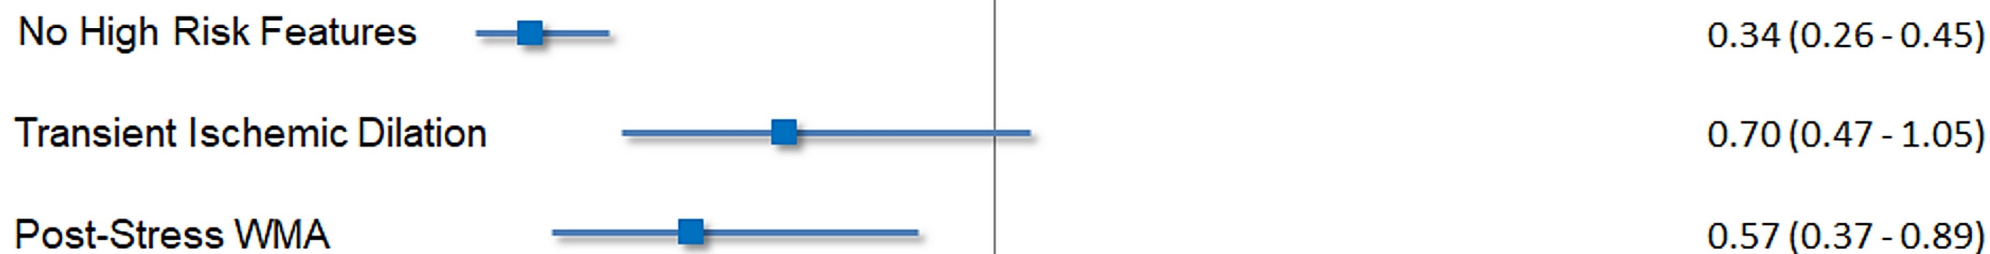

**Minimal Ischemia**

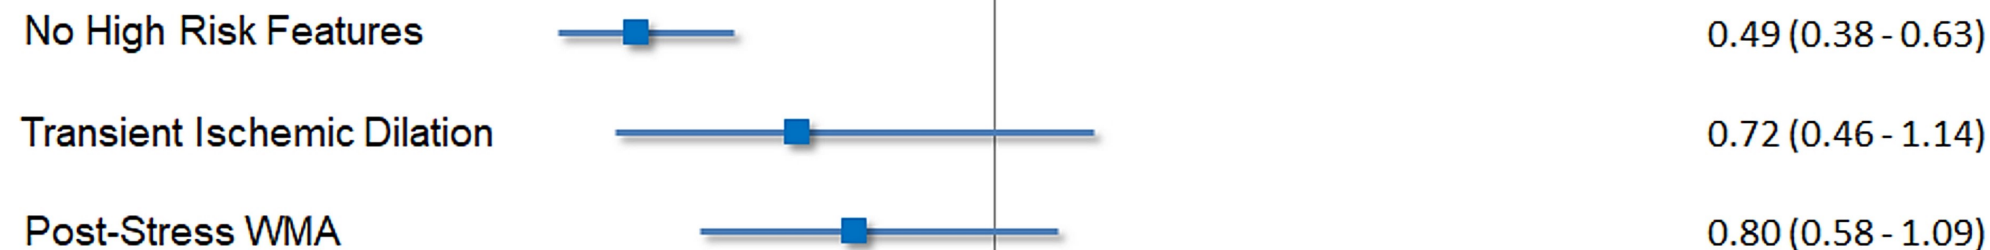

**Mild Ischemia**

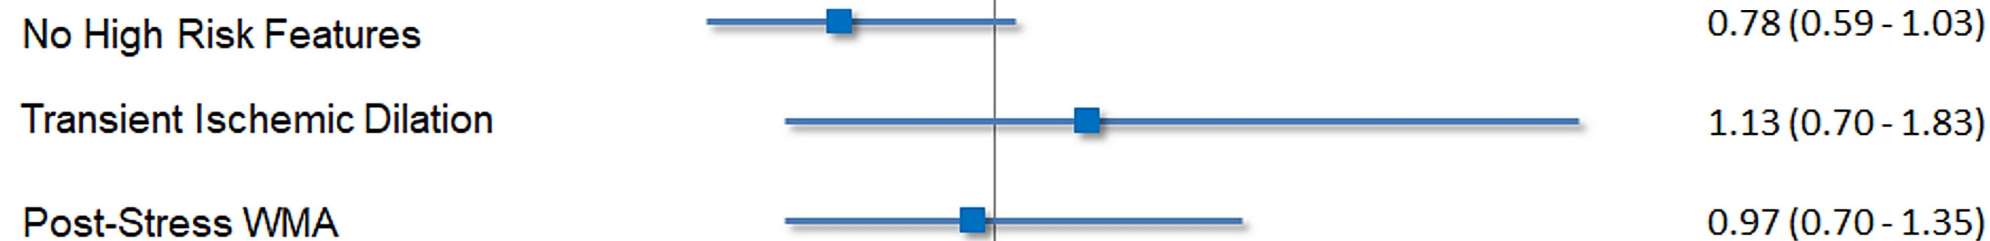

0.00 0.20 0.40 0.60 0.80 1.00 1.20 1.40 1.60 1.80 2.00

*Lower Risk*

**Unadjusted Hazard Ratio**

*Higher Risk*

### Figure S3 - Associations with All-Cause Mortality

Reference Moderate to Severe Ischemia

No High Risk Features

HR  
(95% CI)

#### No Ischemia

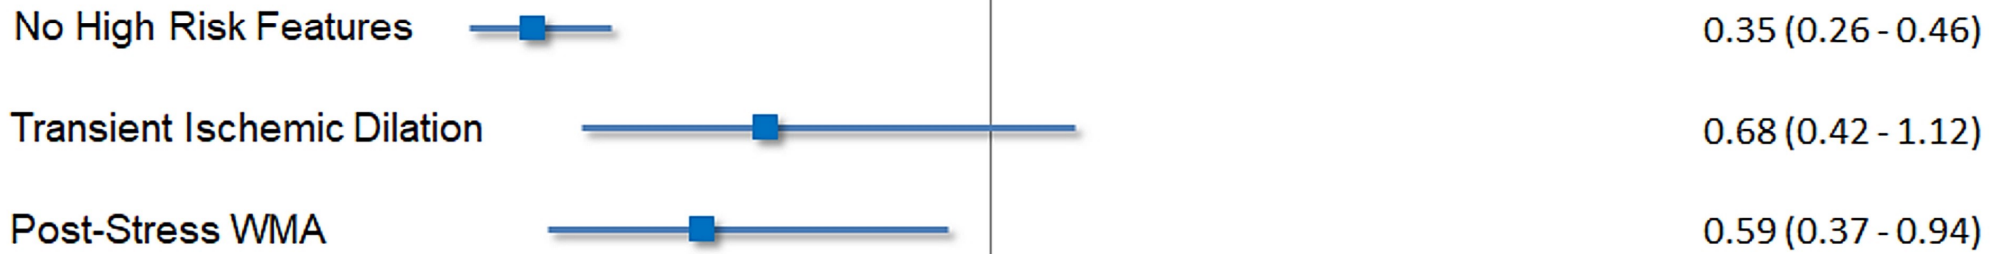

#### Minimal Ischemia

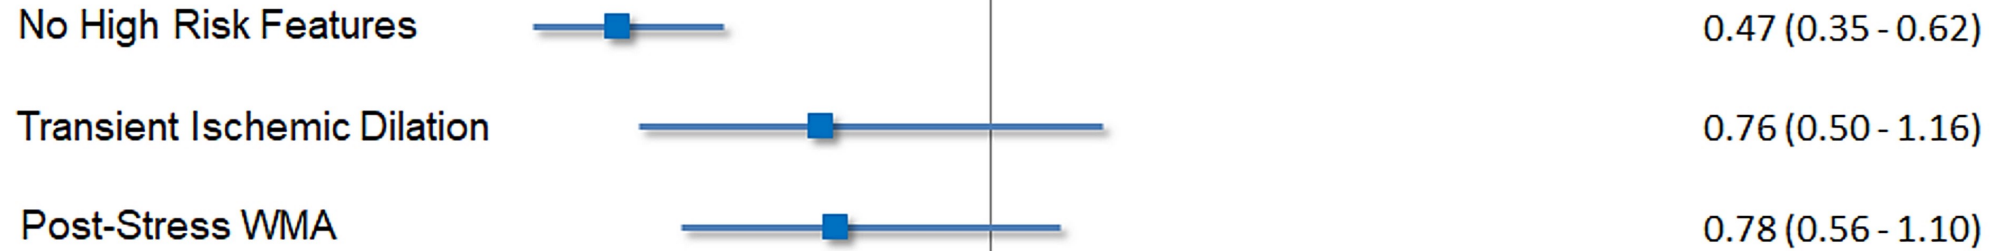

#### Mild Ischemia

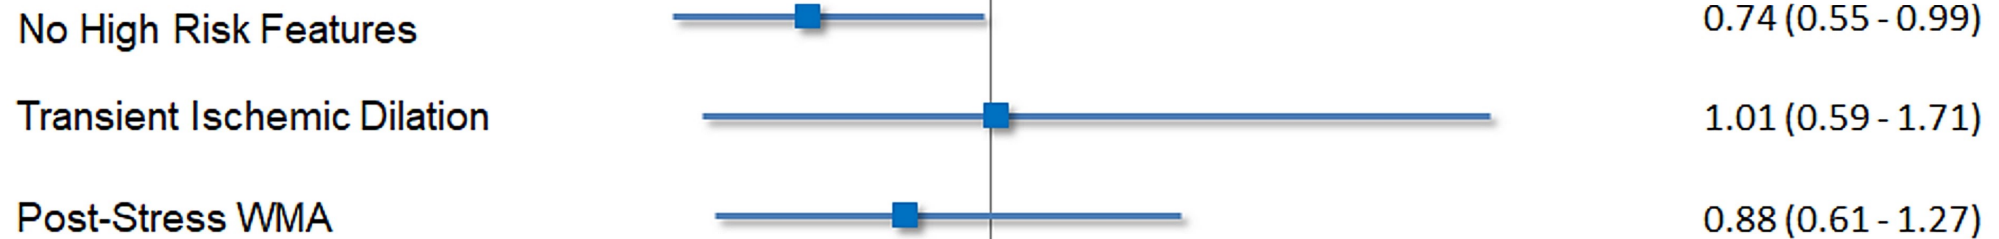

0.00 0.20 0.40 0.60 0.80 1.00 1.20 1.40 1.60 1.80 2.00

*Lower Risk*

Unadjusted Hazard Ratio

*Higher Risk*



**Figure S4 - Associations with Non-Fatal MI or Admission for Unstable Angina**

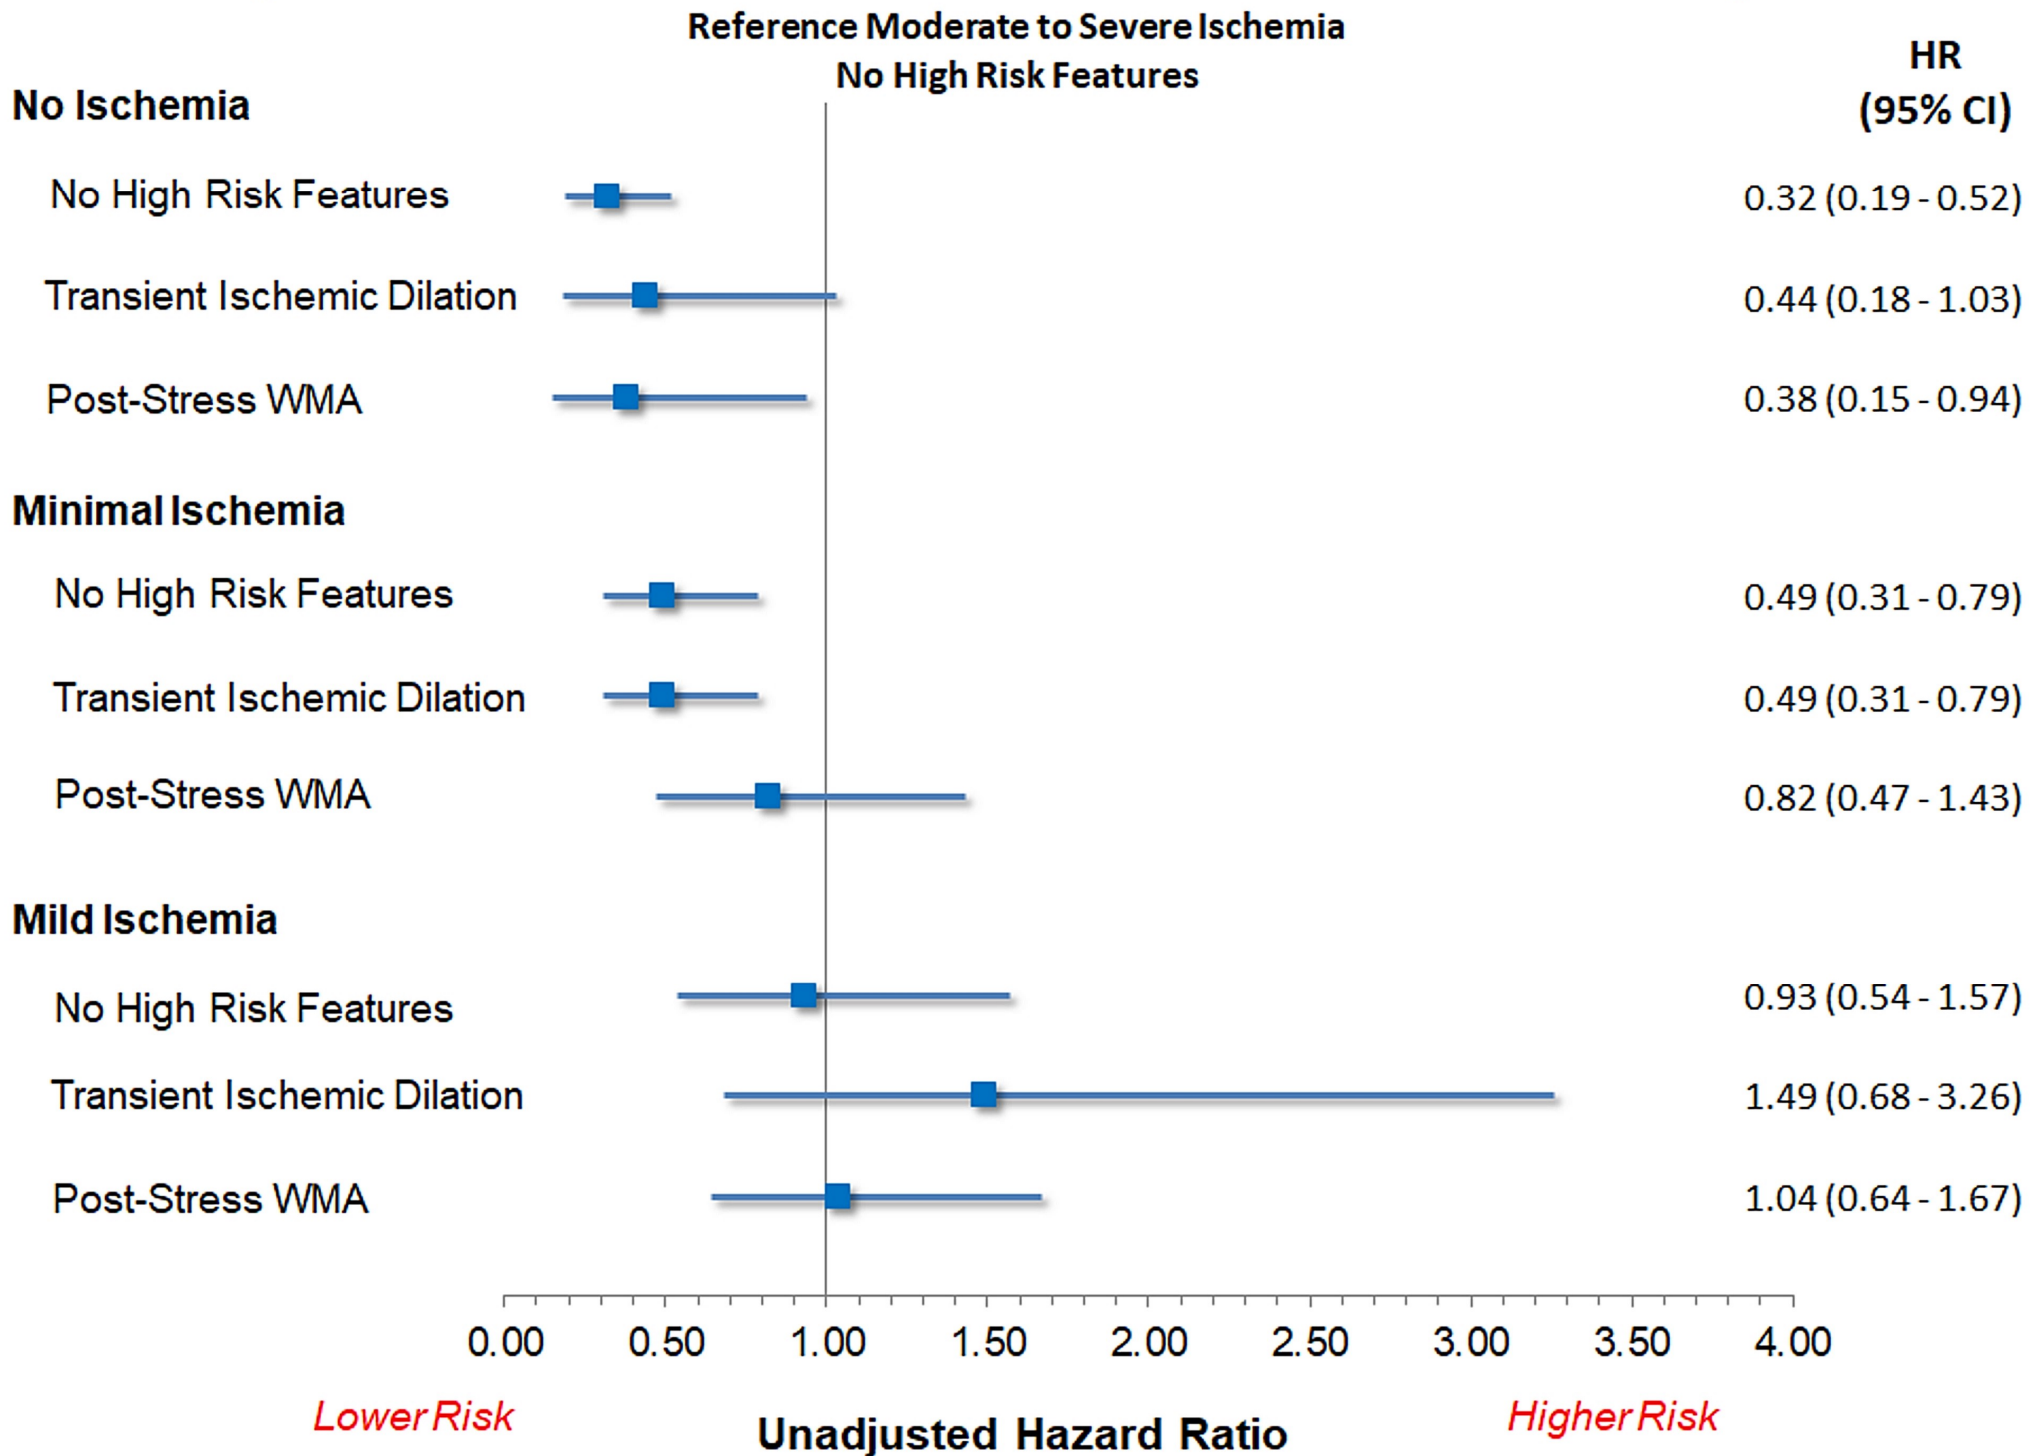

Supplement: jez172_supplementary_data.pdf [file jez172_supplementary_data.pdf]
